# Supplementary material for: Comprehensive Analysis of Ferroptosis- and Immune-Related Signatures to Improve the Prognosis and Diagnosis of Kidney Renal Clear Cell Carcinoma
Source: PubMed Central journal article supplement (PMC9128788; doi:10.3389/fimmu.2022.851312), 2022-05-10
Supplement: DataSheet_1.pdf [file DataSheet_1.pdf]

## Comprehensive analysis of ferroptosis- and immune-related signatures to improve the prognosis and diagnosis of kidney renal clear cell carcinoma

Xiao-Liang Xing<sup>1,2</sup>, Yan Liu<sup>1</sup>, Jiheng Liu<sup>1</sup>, Huanfa Zhou<sup>1</sup>, Huirong Zhang<sup>1</sup>, Qi Zuo<sup>3</sup>, Ping Bu<sup>1</sup>, Tong Duan<sup>3</sup>, Yan Zhou<sup>3\*</sup>, Zhiquan Xiao<sup>1\*</sup>.

<sup>1</sup>Changsha Central Hospital, University of South China, Changsha, 410004, Hunan P. R. China.

<sup>2</sup>School of Public Health and Laboratory Medicine, Hunan University of Medicine, Huaihua 418000, Hunan P. R. China.

<sup>3</sup>First Hospital of Changsha, Changsha, 410005, Hunan P. R. China.

\*Correspondence: Yan Zhou, Email: 921lan@sina.com. Zhiquan Xiao, Email: xzq1892000@163.com.

**Supplementary:** 4 figures and 6 tables

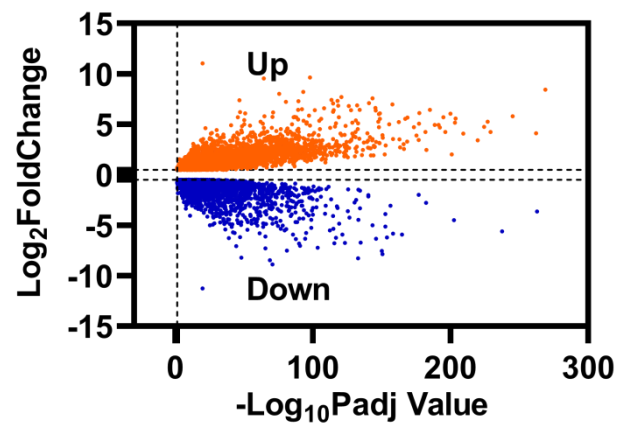

**Supplementary Figure 1** Volcano plot of DEGs between normal and patients with KIRC.

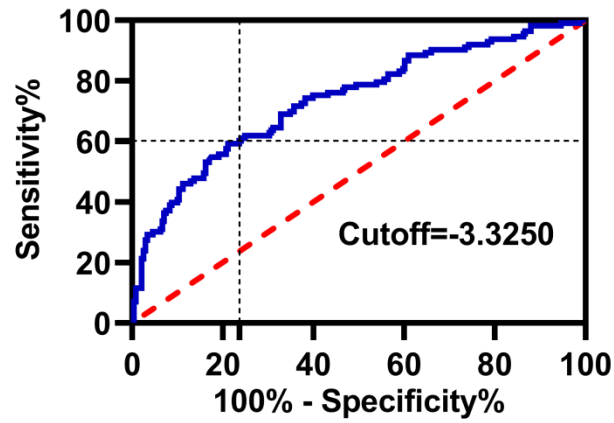

**Supplementary Figure 2** Youden index as the optimal cutoff value.

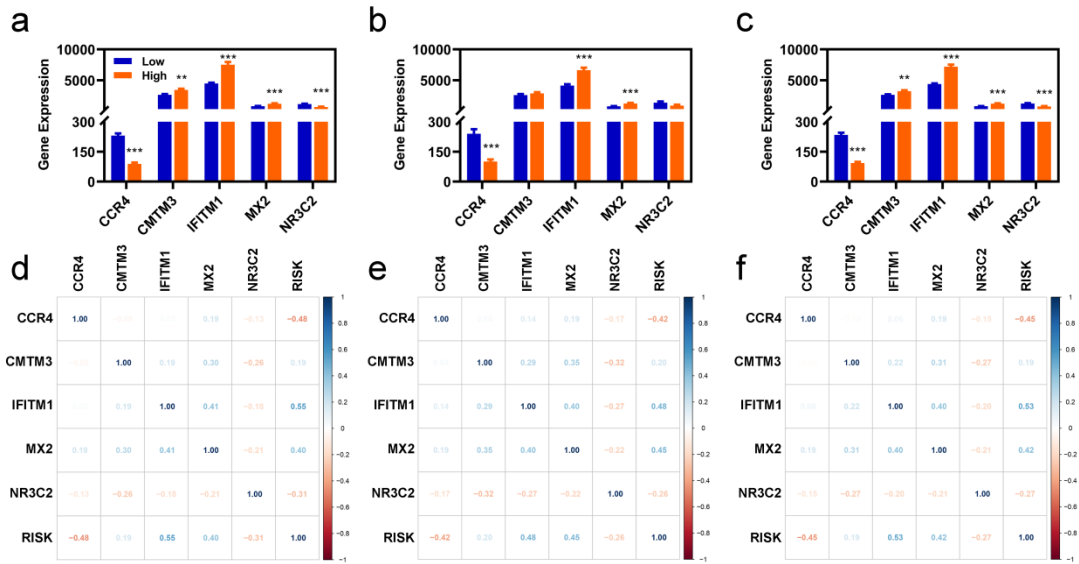

**Supplementary Figure 3** Expression of these five FI-DEGs in the different cohort.

**a-c**, . Expression of these five FI-DEGs in the training cohort (a), validation cohort (b), and entire cohort (c). **d-f**, Correlation of these five FI-DEGs with the risk value in the training cohort (d), validation cohort (e), and entire cohort (f).

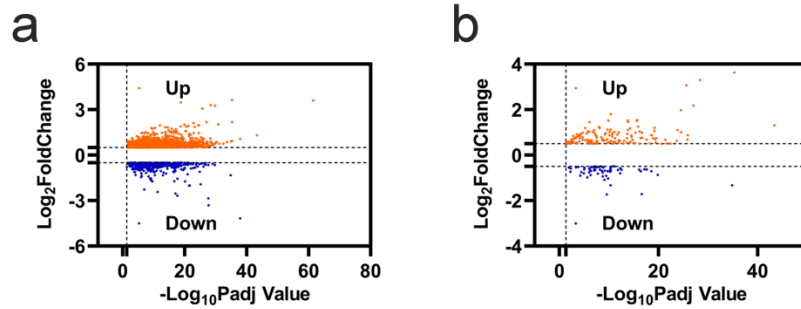

**Supplementary Figure 4** Volcano plot of DEGs (a) and FI-DEGs (b) between KIRC patients with low risk value and KIRC patients with high risk value.

**Supplementary table 1** Correlated pairs of 256 DMPs and 138 FI-DEGs.

| GENE1      | GENE2    | P    | R     | GENE1      | GENE2   | P    | R     |
|------------|----------|------|-------|------------|---------|------|-------|
| cg00029282 | PROM2    | 0.00 | -0.87 | cg15016481 | LRRFIP1 | 0.00 | -0.39 |
| cg00146864 | MAP3K14  | 0.00 | -0.41 | cg15049101 | FGFR2   | 0.00 | -0.32 |
| cg00249032 | SDC4     | 0.00 | -0.34 | cg15066837 | GNAI1   | 0.00 | -0.44 |
| cg00331677 | CX3CL1   | 0.00 | -0.47 | cg15095327 | IL17RE  | 0.00 | -0.69 |
| cg00417094 | CD247    | 0.00 | -0.33 | cg15104031 | S100A14 | 0.00 | -0.42 |
| cg00471190 | IL32     | 0.00 | -0.32 | cg15129144 | EPAS1   | 0.00 | -0.55 |
| cg00532455 | ACVR2A   | 0.00 | -0.42 | cg15281283 | MX2     | 0.00 | -0.35 |
| cg00533183 | PSMB8    | 0.00 | -0.40 | cg15475502 | SEMA5B  | 0.00 | -0.41 |
| cg00539360 | VEGFA    | 0.00 | -0.63 | cg15799353 | TRIB3   | 0.00 | -0.55 |
| cg00575003 | ESRRG    | 0.00 | -0.39 | cg15994182 | PROM2   | 0.00 | -0.83 |
| cg00780520 | PVT1     | 0.00 | -0.52 | cg16001384 | NDRG1   | 0.00 | -0.45 |
| cg00798281 | HLA-DPA1 | 0.00 | -0.44 | cg16172329 | DPP4    | 0.00 | -0.32 |
| cg00902427 | MCHR1    | 0.00 | -0.35 | cg16363586 | BST2    | 0.00 | -0.42 |
| cg01059398 | TNFSF10  | 0.00 | -0.44 | cg16446824 | SEMA6A  | 0.00 | -0.55 |
| cg01154445 | NRP2     | 0.00 | -0.43 | cg16467015 | NEDD4L  | 0.00 | -0.53 |
| cg01165683 | THRB     | 0.00 | -0.50 | cg16486109 | IRF7    | 0.00 | -0.45 |
| cg01189606 | PLXNB1   | 0.00 | -0.49 | cg16592658 | EBI3    | 0.00 | -0.32 |
| cg01298514 | VEGFA    | 0.00 | -0.59 | cg16649560 | IL4R    | 0.00 | -0.39 |
| cg01329005 | BST2     | 0.00 | -0.33 | cg16744911 | SCD     | 0.00 | -0.46 |
| cg01356829 | IL12RB2  | 0.00 | -0.47 | cg16771652 | NOD2    | 0.00 | -0.36 |
| cg01673307 | TAP1     | 0.00 | -0.54 | cg16860392 | FYN     | 0.00 | -0.38 |
| cg01843506 | CCR4     | 0.00 | -0.40 | cg16890093 | PSMB8   | 0.00 | -0.47 |
| cg01889574 | CD82     | 0.00 | 0.41  | cg16900589 | LRRFIP1 | 0.00 | -0.31 |
| cg01924561 | SLC2A1   | 0.00 | -0.43 | cg16949914 | IL2RA   | 0.00 | -0.30 |
| cg01942646 | NR0B2    | 0.00 | -0.36 | cg17127769 | LCP2    | 0.00 | -0.55 |
| cg02099418 | CD28     | 0.00 | -0.40 | cg17356733 | IFNGR2  | 0.00 | -0.49 |

|            |          |      |       |            |          |      |       |
|------------|----------|------|-------|------------|----------|------|-------|
| cg02117924 | ITGB2    | 0.00 | 0.31  | cg17626301 | TAP1     | 0.00 | -0.41 |
| cg02181920 | TAP1     | 0.00 | -0.53 | cg17864487 | LRRFIP1  | 0.00 | -0.50 |
| cg02286081 | HLA-DPB1 | 0.00 | -0.48 | cg18073906 | SEMA5B   | 0.00 | 0.44  |
| cg02334775 | ISG20    | 0.00 | -0.36 | cg18140824 | MASP1    | 0.00 | -0.56 |
| cg02365648 | BNIP3    | 0.00 | -0.45 | cg18367578 | NNMT     | 0.00 | -0.35 |
| cg02657012 | PSMB8    | 0.00 | -0.48 | cg18524262 | NEDD4L   | 0.00 | -0.61 |
| cg02774334 | SEMA4A   | 0.00 | -0.42 | cg18687085 | NEDD4L   | 0.00 | 0.33  |
| cg02806715 | HLA-DMA  | 0.00 | -0.46 | cg18696027 | B2M      | 0.00 | -0.42 |
| cg03030419 | LRRFIP1  | 0.00 | -0.34 | cg18739537 | NFKBIE   | 0.00 | -0.31 |
| cg03440556 | SCD      | 0.00 | -0.46 | cg19009305 | ISG20    | 0.00 | -0.36 |
| cg03458957 | PVT1     | 0.00 | -0.50 | cg19076587 | PHF21A   | 0.00 | 0.35  |
| cg03481855 | PVT1     | 0.00 | -0.42 | cg19136673 | PSMB8    | 0.00 | -0.45 |
| cg03489712 | ZYX      | 0.00 | -0.33 | cg19170009 | VIM      | 0.00 | -0.53 |
| cg03520342 | HLA-DMA  | 0.00 | -0.44 | cg19248557 | HLA-DRA  | 0.00 | -0.37 |
| cg03653601 | ABCC1    | 0.00 | -0.51 | cg19254514 | MASP1    | 0.00 | -0.64 |
| cg03771004 | NR1H4    | 0.00 | -0.30 | cg19408145 | CD48     | 0.00 | -0.32 |
| cg03820120 | SEMA6A   | 0.00 | -0.43 | cg19516340 | RRM2     | 0.00 | -0.30 |
| cg03840259 | GRAP2    | 0.00 | -0.37 | cg19528338 | BMP2     | 0.00 | -0.31 |
| cg03846076 | STC2     | 0.00 | -0.48 | cg19572487 | RARA     | 0.00 | -0.40 |
| cg03885527 | PLIN2    | 0.00 | -0.60 | cg19728382 | STC2     | 0.00 | -0.36 |
| cg03952543 | FABP7    | 0.00 | -0.63 | cg19789466 | OAS1     | 0.00 | -0.37 |
| cg04098585 | CD28     | 0.00 | -0.38 | cg20136855 | TNFRSF1B | 0.00 | -0.32 |
| cg04171808 | CD44     | 0.00 | -0.34 | cg20295214 | AVPR1B   | 0.00 | -0.45 |
| cg04312209 | IL7R     | 0.00 | -0.30 | cg20313963 | SLC2A3   | 0.00 | -0.31 |
| cg04474049 | CAV1     | 0.00 | -0.43 | cg20610181 | CA9      | 0.00 | -0.58 |
| cg04822621 | LCP2     | 0.00 | -0.47 | cg20617328 | HLA-DPA1 | 0.00 | -0.34 |
| cg04880737 | LRRFIP1  | 0.00 | -0.35 | cg20703928 | NCK2     | 0.00 | -0.42 |
| cg04972436 | BIRC5    | 0.00 | 0.30  | cg20724257 | HLA-DRA  | 0.00 | -0.37 |
| cg05253480 | IL17RE   | 0.00 | -0.75 | cg20808613 | AEN      | 0.00 | -0.32 |
| cg05336051 | SH3BP2   | 0.00 | -0.44 | cg20868817 | CD48     | 0.00 | -0.33 |
| cg05372679 | SEMA6D   | 0.00 | 0.32  | cg20940044 | VEGFA    | 0.00 | -0.50 |
| cg05412410 | CARD11   | 0.00 | 0.38  | cg21038461 | ESRRB    | 0.00 | 0.32  |
| cg05437692 | NR3C2    | 0.00 | -0.45 | cg21126506 | ESRRB    | 0.00 | 0.36  |
| cg05490029 | IL7      | 0.00 | -0.37 | cg21139003 | LTBP1    | 0.00 | -0.34 |
| cg05656374 | MX2      | 0.00 | -0.35 | cg21176130 | HLA-E    | 0.00 | -0.32 |
| cg05693489 | TAP1     | 0.00 | -0.52 | cg21211730 | CBLC     | 0.00 | -0.32 |
| cg05697726 | PSMB8    | 0.00 | -0.46 | cg21574271 | BMPR1B   | 0.00 | 0.43  |
| cg05989861 | PROM2    | 0.00 | -0.82 | cg21681212 | EGFR     | 0.00 | -0.33 |
| cg06159340 | CTF1     | 0.00 | -0.65 | cg21686213 | IFITM1   | 0.00 | -0.44 |
| cg06473288 | TAP1     | 0.00 | -0.54 | cg21708130 | LRRFIP1  | 0.00 | 0.32  |
| cg06583577 | SEMA6A   | 0.00 | -0.36 | cg21758773 | HLA-E    | 0.00 | -0.37 |
| cg06650260 | NR0B2    | 0.00 | -0.50 | cg21784383 | ESRRG    | 0.00 | -0.31 |
| cg06656414 | SEMA5B   | 0.00 | -0.49 | cg21831174 | MASP1    | 0.00 | -0.58 |

|            |          |      |       |            |         |      |       |
|------------|----------|------|-------|------------|---------|------|-------|
| cg07044282 | ANGPTL1  | 0.00 | -0.57 | cg21896394 | PVT1    | 0.00 | -0.39 |
| cg07151443 | HLA-DMA  | 0.00 | -0.33 | cg22193276 | LPIN1   | 0.00 | -0.45 |
| cg07355189 | ALOX5    | 0.00 | 0.36  | cg22198044 | SH3BP2  | 0.00 | 0.41  |
| cg07784959 | CXCR4    | 0.00 | -0.43 | cg22272100 | BMP1    | 0.00 | -0.30 |
| cg07991621 | SH3BP2   | 0.00 | 0.36  | cg22298860 | HLA-F   | 0.00 | -0.31 |
| cg08110861 | APOM     | 0.00 | -0.35 | cg22309950 | CD28    | 0.00 | -0.57 |
| cg08173915 | IFNGR2   | 0.00 | -0.50 | cg22427313 | EGFR    | 0.00 | -0.33 |
| cg08246632 | ULK1     | 0.00 | -0.30 | cg22572614 | TNFSF10 | 0.00 | -0.32 |
| cg08575688 | CCL20    | 0.00 | -0.33 | cg22920258 | MCHR1   | 0.00 | -0.34 |
| cg09077096 | CARD11   | 0.00 | 0.45  | cg23071186 | TNFSF14 | 0.00 | -0.31 |
| cg09234582 | HLA-DPB1 | 0.00 | 0.35  | cg23084016 | ALOX5   | 0.00 | -0.36 |
| cg09321817 | HLA-DPA1 | 0.00 | -0.44 | cg23114435 | CD247   | 0.00 | -0.44 |
| cg09326440 | HLA-E    | 0.00 | -0.36 | cg23251761 | PIK3CD  | 0.00 | 0.57  |
| cg09354037 | TAP1     | 0.00 | -0.56 | cg23256150 | NR1H4   | 0.00 | -0.30 |
| cg09664492 | PROM2    | 0.00 | -0.80 | cg23295629 | PVT1    | 0.00 | -0.31 |
| cg09807033 | SEMA6A   | 0.00 | -0.45 | cg23297477 | CMTM3   | 0.00 | -0.30 |
| cg09826050 | ESRRG    | 0.00 | -0.42 | cg23374992 | CXCR4   | 0.00 | -0.49 |
| cg09837648 | PLXNB1   | 0.00 | -0.46 | cg23570810 | IFITM1  | 0.00 | -0.32 |
| cg09993699 | BST2     | 0.00 | -0.32 | cg23613051 | SH3BP2  | 0.00 | 0.40  |
| cg10009968 | CARD11   | 0.00 | 0.38  | cg23656322 | S100A2  | 0.00 | 0.32  |
| cg10055471 | NR0B2    | 0.00 | -0.57 | cg23821329 | VIM     | 0.00 | -0.45 |
| cg10093934 | PDK1     | 0.00 | -0.32 | cg23923934 | HLA-B   | 0.00 | -0.58 |
| cg10224600 | MAPT     | 0.00 | 0.41  | cg24111025 | TAP1    | 0.00 | -0.55 |
| cg10230442 | HRG      | 0.00 | -0.32 | cg24129356 | HLA-DMA | 0.00 | -0.50 |
| cg10316474 | APOBEC3C | 0.00 | -0.53 | cg24302529 | ALOX5   | 0.00 | 0.37  |
| cg10362335 | TNFSF14  | 0.00 | -0.38 | cg24421410 | HLA-DMA | 0.00 | -0.46 |
| cg10522125 | ITGAL    | 0.00 | -0.47 | cg24443250 | TNFSF8  | 0.00 | -0.35 |
| cg10601943 | HLA-F    | 0.00 | -0.52 | cg24476033 | C3      | 0.00 | 0.31  |
| cg10745272 | SH3BP2   | 0.00 | 0.38  | cg24492202 | SH3BP2  | 0.00 | -0.53 |
| cg10790685 | VIM      | 0.00 | -0.44 | cg24512973 | MUC1    | 0.00 | -0.61 |
| cg10864979 | PVT1     | 0.00 | -0.34 | cg24580782 | NR0B2   | 0.00 | -0.62 |
| cg10869531 | SH3BP2   | 0.00 | -0.52 | cg24593324 | VCAM1   | 0.00 | -0.46 |
| cg11145461 | CSRP1    | 0.00 | -0.40 | cg25018049 | CSRP1   | 0.00 | -0.37 |
| cg11215296 | AVPR1B   | 0.00 | -0.48 | cg25052156 | FGFR2   | 0.00 | -0.52 |
| cg11909912 | MAPT     | 0.00 | 0.38  | cg25135018 | IL6R    | 0.00 | -0.39 |
| cg12069042 | PLXNB1   | 0.00 | -0.53 | cg25198340 | IL17RD  | 0.00 | -0.42 |
| cg12123019 | IL12RB1  | 0.00 | -0.49 | cg25241038 | PROM2   | 0.00 | -0.82 |
| cg12253437 | TAP1     | 0.00 | -0.54 | cg25258233 | HLA-DRA | 0.00 | -0.35 |
| cg12595667 | CXCR4    | 0.00 | -0.41 | cg25281029 | KITLG   | 0.00 | -0.44 |
| cg12700271 | HLA-E    | 0.00 | -0.33 | cg25343661 | VEGFA   | 0.00 | -0.59 |
| cg12710152 | LCK      | 0.00 | -0.39 | cg25373579 | VEGFA   | 0.00 | -0.61 |
| cg12939283 | HLA-DPB1 | 0.00 | -0.40 | cg25580782 | IL15RA  | 0.00 | 0.30  |
| cg13007871 | HLA-E    | 0.00 | -0.37 | cg25592413 | STC2    | 0.00 | -0.44 |

|            |          |      |       |            |         |      |       |
|------------|----------|------|-------|------------|---------|------|-------|
| cg13092901 | TYMP     | 0.00 | -0.40 | cg25594165 | NRG3    | 0.00 | -0.35 |
| cg13144783 | CCR1     | 0.00 | -0.32 | cg25647415 | SEMA3B  | 0.00 | -0.30 |
| cg13165140 | TAP1     | 0.00 | -0.57 | cg25954539 | HLA-B   | 0.00 | -0.46 |
| cg13346441 | BID      | 0.00 | 0.32  | cg25961567 | NCK2    | 0.00 | -0.48 |
| cg13445177 | S100A10  | 0.00 | -0.30 | cg26063719 | VIM     | 0.00 | -0.56 |
| cg13493001 | LCN12    | 0.00 | -0.41 | cg26065841 | CHAC1   | 0.00 | -0.38 |
| cg13592599 | JAG1     | 0.00 | -0.40 | cg26234900 | TAP1    | 0.00 | -0.36 |
| cg13727618 | INSR     | 0.00 | -0.50 | cg26315984 | TNFSF4  | 0.00 | -0.34 |
| cg14052728 | PROM2    | 0.00 | -0.81 | cg26351966 | SCD     | 0.00 | -0.37 |
| cg14082886 | CD44     | 0.00 | -0.34 | cg26389955 | PRKCA   | 0.00 | 0.36  |
| cg14260889 | VIM      | 0.00 | -0.56 | cg26549174 | ICAM1   | 0.00 | -0.36 |
| cg14328173 | MASP1    | 0.00 | -0.55 | cg26675785 | ABCC1   | 0.00 | -0.30 |
| cg14334810 | PLIN2    | 0.00 | -0.51 | cg26815454 | GRAP2   | 0.00 | -0.31 |
| cg14356799 | HLA-DPB1 | 0.00 | -0.43 | cg26878655 | RARA    | 0.00 | -0.43 |
| cg14520913 | NNMT     | 0.00 | -0.38 | cg26928531 | HLA-DRA | 0.00 | -0.31 |
| cg14967066 | IFITM1   | 0.00 | -0.41 | cg27544046 | VCAM1   | 0.00 | -0.34 |

**Supplementary table 2** The difference immune cells and factors between normal and KIRC patients.

| Type              | Cell                       | Normal (n=72) |      | Cancer (n=530) |      |
|-------------------|----------------------------|---------------|------|----------------|------|
|                   |                            | MEAN          | STD  | MEAN           | STD  |
| CIBERSORT         | B cell naive               | 0.09          | 0.05 | 0.01           | 0.02 |
|                   | T cell CD4+ memory resting | 0.23          | 0.06 | 0.13           | 0.08 |
|                   | Macrophage M1              | 0.03          | 0.02 | 0.06           | 0.03 |
|                   | T cell CD8+                | 0.05          | 0.04 | 0.17           | 0.12 |
|                   | T cell follicular helper   | 0.01          | 0.01 | 0.03           | 0.03 |
|                   | Mast cell activated        | 0.05          | 0.05 | 0.02           | 0.03 |
|                   | B cell plasma              | 0.08          | 0.06 | 0.05           | 0.04 |
|                   | Monocyte                   | 0.08          | 0.05 | 0.05           | 0.05 |
|                   | Macrophage M2              | 0.26          | 0.10 | 0.33           | 0.12 |
|                   | T cell gamma delta         | 0.00          | 0.01 | 0.02           | 0.03 |
|                   | T cell regulatory (Tregs)  | 0.01          | 0.01 | 0.01           | 0.02 |
|                   | NK cell resting            | 0.00          | 0.01 | 0.01           | 0.02 |
|                   | Macrophage M0              | 0.00          | 0.01 | 0.02           | 0.06 |
|                   | Eosinophil                 | 0.00          | 0.00 | 0.00           | 0.00 |
|                   | NK cell activated          | 0.06          | 0.04 | 0.05           | 0.03 |
| Mast cell resting | 0.02                       | 0.04          | 0.01 | 0.03           |      |
| CIBERSORT-ABS     | B cell naive               | 0.02          | 0.01 | 0.01           | 0.01 |
|                   | Macrophage M2              | 0.07          | 0.06 | 0.18           | 0.10 |
|                   | Macrophage M1              | 0.01          | 0.01 | 0.03           | 0.03 |
|                   | T cell CD8+                | 0.01          | 0.01 | 0.10           | 0.09 |

|            |                                  |       |       |       |       |
|------------|----------------------------------|-------|-------|-------|-------|
|            | T cell follicular helper         | 0.00  | 0.00  | 0.02  | 0.02  |
|            | NK cell activated                | 0.01  | 0.01  | 0.03  | 0.02  |
|            | T cell regulatory (Tregs)        | 0.00  | 0.00  | 0.01  | 0.01  |
|            | T cell gamma delta               | 0.00  | 0.00  | 0.01  | 0.02  |
|            | B cell plasma                    | 0.02  | 0.01  | 0.03  | 0.02  |
|            | Macrophage M0                    | 0.00  | 0.00  | 0.01  | 0.02  |
|            | NK cell resting                  | 0.00  | 0.00  | 0.00  | 0.01  |
| EPIC       | T cell CD4+                      | 0.09  | 0.02  | 0.04  | 0.02  |
|            | Endothelial cell                 | 0.07  | 0.05  | 0.19  | 0.12  |
|            | Macrophage                       | 0.00  | 0.00  | 0.03  | 0.03  |
|            | uncharacterized cell             | 0.79  | 0.05  | 0.68  | 0.14  |
|            | NK cell                          | 0.00  | 0.00  | 0.00  | 0.00  |
|            | Cancer associated fibroblast     | 0.01  | 0.01  | 0.03  | 0.05  |
| MCPCOUNTER | T cell                           | 63.42 | 34.48 | 10.51 | 11.49 |
|            | Monocyte                         | 14.54 | 8.67  | 38.57 | 17.33 |
|            | Macrophage/Monocyte              | 14.54 | 8.67  | 38.57 | 17.33 |
|            | NK cell                          | 0.18  | 0.17  | 0.66  | 0.37  |
|            | Neutrophil                       | 18.87 | 6.46  | 12.07 | 5.30  |
|            | cytotoxicity score               | 1.12  | 1.33  | 9.06  | 7.24  |
|            | Endothelial cell                 | 24.34 | 10.13 | 51.37 | 30.49 |
|            | T cell CD8+                      | 1.36  | 1.42  | 12.84 | 17.05 |
|            | Myeloid dendritic cell           | 2.78  | 2.05  | 4.24  | 2.51  |
| QUANTISEQ  | Macrophage M1                    | 0.01  | 0.01  | 0.04  | 0.03  |
|            | T cell CD4+ (non-regulatory)     | 0.01  | 0.01  | 0.03  | 0.02  |
|            | Neutrophil                       | 0.17  | 0.08  | 0.12  | 0.05  |
|            | T cell CD8+                      | 0.00  | 0.00  | 0.03  | 0.05  |
|            | Macrophage M2                    | 0.04  | 0.01  | 0.06  | 0.03  |
|            | uncharacterized cell             | 0.73  | 0.06  | 0.68  | 0.08  |
|            | T cell regulatory (Tregs)        | 0.01  | 0.01  | 0.01  | 0.01  |
|            | Myeloid dendritic cell           | 0.02  | 0.02  | 0.01  | 0.02  |
|            | NK cell                          | 0.01  | 0.00  | 0.01  | 0.01  |
| TIMER      | Neutrophil                       | 0.03  | 0.04  | 0.14  | 0.10  |
|            | Myeloid dendritic cell           | 0.28  | 0.12  | 0.50  | 0.22  |
|            | T cell CD8+                      | 0.04  | 0.05  | 0.21  | 0.18  |
|            | T cell CD4+                      | 0.10  | 0.05  | 0.14  | 0.08  |
|            | Macrophage                       | 0.03  | 0.06  | 0.08  | 0.11  |
|            | B cell                           | 0.07  | 0.05  | 0.10  | 0.07  |
| XCELL      | T cell NK                        | 0.01  | 0.01  | 0.11  | 0.05  |
|            | T cell CD4+ effector memory      | 0.00  | 0.01  | 0.07  | 0.04  |
|            | Myeloid dendritic cell activated | 0.07  | 0.08  | 0.21  | 0.09  |
|            | Hematopoietic stem cell          | 0.47  | 0.15  | 0.24  | 0.15  |
|            | microenvironment score           | 0.10  | 0.05  | 0.25  | 0.11  |
|            | T cell CD4+ Th1                  | 0.09  | 0.03  | 0.17  | 0.07  |

|  |                              |      |      |      |      |
|--|------------------------------|------|------|------|------|
|  | Endothelial cell             | 0.10 | 0.05 | 0.23 | 0.12 |
|  | Monocyte                     | 0.00 | 0.01 | 0.04 | 0.04 |
|  | immune score                 | 0.01 | 0.01 | 0.12 | 0.11 |
|  | Mast cell                    | 0.00 | 0.00 | 0.01 | 0.01 |
|  | T cell CD8+ naive            | 0.00 | 0.00 | 0.01 | 0.01 |
|  | T cell CD8+ central memory   | 0.00 | 0.01 | 0.08 | 0.09 |
|  | Macrophage                   | 0.00 | 0.01 | 0.03 | 0.04 |
|  | T cell CD8+                  | 0.00 | 0.00 | 0.07 | 0.09 |
|  | T cell CD8+ effector memory  | 0.00 | 0.00 | 0.03 | 0.05 |
|  | Macrophage M1                | 0.00 | 0.00 | 0.01 | 0.02 |
|  | Macrophage M2                | 0.02 | 0.01 | 0.04 | 0.03 |
|  | Myeloid dendritic cell       | 0.00 | 0.01 | 0.01 | 0.01 |
|  | stroma score                 | 0.09 | 0.05 | 0.13 | 0.07 |
|  | B cell plasma                | 0.00 | 0.00 | 0.01 | 0.02 |
|  | Class-switched memory B cell | 0.00 | 0.00 | 0.01 | 0.01 |
|  | B cell                       | 0.00 | 0.00 | 0.02 | 0.05 |
|  | Plasmacytoid dendritic cell  | 0.00 | 0.00 | 0.01 | 0.01 |
|  | T cell CD4+ central memory   | 0.00 | 0.00 | 0.01 | 0.01 |
|  | T cell CD4+ Th2              | 0.00 | 0.02 | 0.03 | 0.07 |
|  | Cancer associated fibroblast | 0.04 | 0.07 | 0.02 | 0.05 |
|  | T cell CD4+ naive            | 0.00 | 0.00 | 0.01 | 0.02 |
|  | B cell naive                 | 0.00 | 0.00 | 0.00 | 0.00 |
|  | T cell CD4+ memory           | 0.00 | 0.00 | 0.00 | 0.01 |
|  | Common lymphoid progenitor   | 0.03 | 0.01 | 0.03 | 0.02 |
|  | Eosinophil                   | 0.00 | 0.00 | 0.00 | 0.00 |

**Supplementary table 3** The significantly enriched GO term for 784 FI-DEGs between the normal and patients with KIRC.

| Category_Term |                                                              | Count | FDR    |
|---------------|--------------------------------------------------------------|-------|--------|
| BP            | immune response                                              | 167   | 0.0000 |
|               | inflammatory response                                        | 115   | 0.0000 |
|               | regulation of immune response                                | 69    | 0.0000 |
|               | Fc-gamma receptor signaling pathway involved in phagocytosis | 53    | 0.0000 |
|               | chemotaxis                                                   | 52    | 0.0000 |
|               | Fc-epsilon receptor signaling pathway                        | 60    | 0.0000 |
|               | complement activation, classical pathway                     | 46    | 0.0000 |
|               | signal transduction                                          | 147   | 0.0000 |
|               | complement activation                                        | 41    | 0.0000 |
|               | innate immune response                                       | 83    | 0.0000 |
|               | response to lipopolysaccharide                               | 51    | 0.0000 |
|               | positive regulation of ERK1 and ERK2 cascade                 | 52    | 0.0000 |



|                                                                        |    |        |
|------------------------------------------------------------------------|----|--------|
| cell surface receptor signaling pathway                                | 64 | 0.0000 |
| positive regulation of cell proliferation                              | 83 | 0.0000 |
| receptor-mediated endocytosis                                          | 53 | 0.0000 |
| cell-cell signaling                                                    | 61 | 0.0000 |
| interferon-gamma-mediated signaling pathway                            | 34 | 0.0000 |
| chemokine-mediated signaling pathway                                   | 33 | 0.0000 |
| T cell costimulation                                                   | 34 | 0.0000 |
| angiogenesis                                                           | 52 | 0.0000 |
| positive regulation of cell migration                                  | 46 | 0.0000 |
| positive regulation of angiogenesis                                    | 37 | 0.0000 |
| semaphorin-plexin signaling pathway                                    | 22 | 0.0000 |
| positive regulation of cytosolic calcium ion concentration             | 39 | 0.0000 |
| steroid hormone mediated signaling pathway                             | 27 | 0.0000 |
| response to hypoxia                                                    | 43 | 0.0000 |
| B cell receptor signaling pathway                                      | 26 | 0.0000 |
| cell chemotaxis                                                        | 28 | 0.0000 |
| T cell receptor signaling pathway                                      | 39 | 0.0000 |
| antigen processing and presentation                                    | 25 | 0.0000 |
| neutrophil chemotaxis                                                  | 26 | 0.0000 |
| transmembrane receptor protein tyrosine kinase signaling pathway       | 30 | 0.0000 |
| positive regulation of peptidyl-tyrosine phosphorylation               | 28 | 0.0000 |
| positive regulation of phosphatidylinositol 3-kinase signaling         | 25 | 0.0000 |
| regulation of cell proliferation                                       | 40 | 0.0000 |
| positive regulation of MAPK cascade                                    | 27 | 0.0000 |
| negative regulation of apoptotic process                               | 64 | 0.0000 |
| negative regulation of axon extension involved in axon guidance        | 17 | 0.0000 |
| positive regulation of endothelial cell proliferation                  | 25 | 0.0000 |
| leukocyte migration                                                    | 32 | 0.0000 |
| tumor necrosis factor-mediated signaling pathway                       | 31 | 0.0000 |
| MAPK cascade                                                           | 46 | 0.0000 |
| negative chemotaxis                                                    | 18 | 0.0000 |
| positive regulation of B cell activation                               | 16 | 0.0000 |
| regulation of apoptotic process                                        | 40 | 0.0000 |
| defense response to virus                                              | 35 | 0.0000 |
| positive regulation of NF-kappaB transcription factor activity         | 31 | 0.0000 |
| negative regulation of cell proliferation                              | 55 | 0.0000 |
| peptidyl-tyrosine phosphorylation                                      | 33 | 0.0000 |
| type I interferon signaling pathway                                    | 22 | 0.0000 |
| positive regulation of transcription from RNA polymerase II promoter   | 96 | 0.0000 |
| antigen processing and presentation of peptide antigen via MHC class I | 16 | 0.0000 |
| positive regulation of inflammatory response                           | 23 | 0.0000 |

|                                                                                           |    |        |
|-------------------------------------------------------------------------------------------|----|--------|
| positive regulation of cell division                                                      | 19 | 0.0000 |
| positive regulation of pathway-restricted SMAD protein phosphorylation                    | 19 | 0.0000 |
| positive regulation of protein kinase B signaling                                         | 24 | 0.0000 |
| positive regulation of protein phosphorylation                                            | 29 | 0.0000 |
| positive regulation of gene expression                                                    | 42 | 0.0000 |
| semaphorin-plexin signaling pathway involved in axon guidance                             | 11 | 0.0000 |
| phosphatidylinositol-mediated signaling                                                   | 26 | 0.0000 |
| positive chemotaxis                                                                       | 16 | 0.0000 |
| defense response to bacterium                                                             | 30 | 0.0000 |
| antigen processing and presentation of peptide or polysaccharide antigen via MHC class II | 12 | 0.0000 |
| cytokine-mediated signaling pathway                                                       | 28 | 0.0000 |
| cellular response to lipopolysaccharide                                                   | 26 | 0.0000 |
| intracellular receptor signaling pathway                                                  | 16 | 0.0000 |
| neural crest cell migration                                                               | 17 | 0.0000 |
| positive regulation of MAP kinase activity                                                | 19 | 0.0000 |
| positive regulation of smooth muscle cell proliferation                                   | 19 | 0.0000 |
| positive regulation of T cell proliferation                                               | 19 | 0.0000 |
| response to virus                                                                         | 25 | 0.0000 |
| T cell activation                                                                         | 17 | 0.0000 |
| positive regulation of vasodilation                                                       | 14 | 0.0000 |
| phosphatidylinositol phosphorylation                                                      | 23 | 0.0000 |
| regulation of phosphatidylinositol 3-kinase signaling                                     | 21 | 0.0000 |
| branchiomotor neuron axon guidance                                                        | 9  | 0.0000 |
| monocyte chemotaxis                                                                       | 16 | 0.0000 |
| cellular response to mechanical stimulus                                                  | 20 | 0.0000 |
| apoptotic signaling pathway                                                               | 20 | 0.0000 |
| vascular endothelial growth factor receptor signaling pathway                             | 20 | 0.0000 |
| cellular response to interferon-gamma                                                     | 18 | 0.0000 |
| adaptive immune response                                                                  | 28 | 0.0000 |
| phagocytosis, recognition                                                                 | 13 | 0.0000 |
| proteolysis                                                                               | 55 | 0.0000 |
| wound healing                                                                             | 20 | 0.0000 |
| phagocytosis, engulfment                                                                  | 14 | 0.0000 |
| cellular response to tumor necrosis factor                                                | 23 | 0.0000 |
| defense response                                                                          | 18 | 0.0000 |
| lipopolysaccharide-mediated signaling pathway                                             | 13 | 0.0000 |
| platelet activation                                                                       | 23 | 0.0000 |
| apoptotic process                                                                         | 58 | 0.0000 |
| positive regulation of interferon-gamma production                                        | 15 | 0.0000 |
| SMAD protein signal transduction                                                          | 17 | 0.0000 |
| antigen processing and presentation of exogenous peptide antigen                          | 8  | 0.0000 |

|                                                                                   |    |        |
|-----------------------------------------------------------------------------------|----|--------|
| via MHC class I, TAP-independent                                                  |    |        |
| transcription initiation from RNA polymerase II promoter                          | 26 | 0.0000 |
| macrophage chemotaxis                                                             | 9  | 0.0000 |
| G-protein coupled receptor signaling pathway                                      | 78 | 0.0000 |
| positive regulation of apoptotic process                                          | 38 | 0.0000 |
| activation of MAPK activity                                                       | 21 | 0.0000 |
| positive regulation of phosphatidylinositol 3-kinase activity                     | 12 | 0.0000 |
| regulation of axon extension involved in axon guidance                            | 7  | 0.0000 |
| positive regulation of endothelial cell migration                                 | 14 | 0.0000 |
| positive regulation of fibroblast proliferation                                   | 15 | 0.0000 |
| aging                                                                             | 26 | 0.0000 |
| induction of positive chemotaxis                                                  | 9  | 0.0000 |
| response to wounding                                                              | 16 | 0.0000 |
| peptidyl-tyrosine autophosphorylation                                             | 13 | 0.0000 |
| epidermal growth factor receptor signaling pathway                                | 15 | 0.0000 |
| cell proliferation                                                                | 41 | 0.0000 |
| extrinsic apoptotic signaling pathway                                             | 13 | 0.0000 |
| growth                                                                            | 11 | 0.0000 |
| T cell chemotaxis                                                                 | 7  | 0.0000 |
| receptor internalization                                                          | 13 | 0.0000 |
| positive regulation of epithelial cell proliferation                              | 15 | 0.0000 |
| cellular response to vascular endothelial growth factor stimulus                  | 10 | 0.0000 |
| T cell differentiation                                                            | 11 | 0.0000 |
| cellular response to interleukin-1                                                | 16 | 0.0000 |
| positive regulation of leukocyte chemotaxis                                       | 9  | 0.0000 |
| ureteric bud development                                                          | 12 | 0.0000 |
| antigen processing and presentation of exogenous peptide antigen via MHC class II | 18 | 0.0000 |
| defense response to Gram-negative bacterium                                       | 14 | 0.0000 |
| activation of cysteine-type endopeptidase activity involved in apoptotic process  | 17 | 0.0000 |
| response to drug                                                                  | 35 | 0.0000 |
| cytokine production                                                               | 10 | 0.0000 |
| positive regulation of blood vessel endothelial cell migration                    | 9  | 0.0000 |
| defense response to Gram-positive bacterium                                       | 17 | 0.0000 |
| negative regulation of viral genome replication                                   | 12 | 0.0000 |
| retina homeostasis                                                                | 12 | 0.0000 |
| positive regulation of mitotic nuclear division                                   | 10 | 0.0000 |
| positive regulation of extrinsic apoptotic signaling pathway                      | 10 | 0.0000 |
| positive regulation of GTPase activity                                            | 52 | 0.0000 |
| positive regulation of DNA replication                                            | 12 | 0.0000 |
| negative regulation of endothelial cell apoptotic process                         | 10 | 0.0001 |
| lymphocyte chemotaxis                                                             | 10 | 0.0001 |

|                                                                                                 |    |        |
|-------------------------------------------------------------------------------------------------|----|--------|
| response to estradiol                                                                           | 17 | 0.0001 |
| cellular iron ion homeostasis                                                                   | 12 | 0.0001 |
| antibacterial humoral response                                                                  | 12 | 0.0001 |
| positive regulation of I-kappaB kinase/NF-kappaB signaling                                      | 23 | 0.0001 |
| negative regulation of gene expression                                                          | 21 | 0.0001 |
| negative regulation of angiogenesis                                                             | 14 | 0.0001 |
| positive regulation of neutrophil chemotaxis                                                    | 9  | 0.0001 |
| immunoglobulin mediated immune response                                                         | 7  | 0.0001 |
| antigen processing and presentation of exogenous peptide antigen via MHC class I, TAP-dependent | 14 | 0.0001 |
| positive regulation of interleukin-6 production                                                 | 12 | 0.0001 |
| antigen processing and presentation of endogenous peptide antigen via MHC class I               | 6  | 0.0001 |
| stimulatory C-type lectin receptor signaling pathway                                            | 18 | 0.0001 |
| regulation of cell migration                                                                    | 15 | 0.0001 |
| negative regulation of blood pressure                                                           | 10 | 0.0001 |
| positive regulation of tyrosine phosphorylation of Stat3 protein                                | 11 | 0.0001 |
| response to glucocorticoid                                                                      | 14 | 0.0001 |
| cellular response to hypoxia                                                                    | 17 | 0.0001 |
| positive regulation of tumor necrosis factor production                                         | 12 | 0.0001 |
| response to amino acid                                                                          | 10 | 0.0001 |
| response to progesterone                                                                        | 11 | 0.0001 |
| positive regulation of B cell proliferation                                                     | 11 | 0.0001 |
| response to heat                                                                                | 12 | 0.0001 |
| negative regulation of cell growth                                                              | 19 | 0.0001 |
| positive regulation of vasoconstriction                                                         | 10 | 0.0002 |
| axon guidance                                                                                   | 22 | 0.0002 |
| leukocyte cell-cell adhesion                                                                    | 9  | 0.0002 |
| positive regulation of interleukin-12 production                                                | 9  | 0.0002 |
| positive regulation of T-helper 2 cell differentiation                                          | 6  | 0.0002 |
| positive regulation of protein kinase C signaling                                               | 6  | 0.0002 |
| regulation of MAPK cascade                                                                      | 11 | 0.0002 |
| negative regulation of extrinsic apoptotic signaling pathway via death domain receptors         | 10 | 0.0002 |
| intracellular signal transduction                                                               | 39 | 0.0002 |
| viral process                                                                                   | 32 | 0.0002 |
| detection of bacterium                                                                          | 7  | 0.0002 |
| positive regulation of transcription, DNA-templated                                             | 46 | 0.0002 |
| platelet degranulation                                                                          | 17 | 0.0002 |
| protein phosphorylation                                                                         | 42 | 0.0003 |
| positive regulation of nitric oxide biosynthetic process                                        | 11 | 0.0003 |
| positive regulation of vascular endothelial growth factor production                            | 9  | 0.0003 |

|                                                                                      |    |        |
|--------------------------------------------------------------------------------------|----|--------|
| positive regulation of activated T cell proliferation                                | 9  | 0.0003 |
| positive regulation of interleukin-4 production                                      | 8  | 0.0003 |
| facial nerve structural organization                                                 | 6  | 0.0004 |
| positive regulation of alpha-beta T cell proliferation                               | 6  | 0.0004 |
| trigeminal nerve structural organization                                             | 5  | 0.0004 |
| response to toxic substance                                                          | 15 | 0.0004 |
| regulation of defense response to virus by virus                                     | 9  | 0.0004 |
| negative regulation of neuron apoptotic process                                      | 19 | 0.0004 |
| protein autophosphorylation                                                          | 22 | 0.0005 |
| cell migration involved in sprouting angiogenesis                                    | 7  | 0.0005 |
| phospholipase C-activating G-protein coupled receptor signaling pathway              | 13 | 0.0005 |
| organ regeneration                                                                   | 11 | 0.0006 |
| extrinsic apoptotic signaling pathway via death domain receptors                     | 10 | 0.0006 |
| female pregnancy                                                                     | 15 | 0.0006 |
| negative regulation of inflammatory response                                         | 14 | 0.0007 |
| activin receptor signaling pathway                                                   | 7  | 0.0007 |
| positive regulation of vascular endothelial growth factor receptor signaling pathway | 7  | 0.0007 |
| positive regulation of macroautophagy                                                | 8  | 0.0008 |
| regulation of platelet aggregation                                                   | 5  | 0.0010 |
| cellular response to iron ion                                                        | 5  | 0.0010 |
| adenylate cyclase-activating G-protein coupled receptor signaling pathway            | 11 | 0.0010 |
| positive regulation of chemokine production                                          | 7  | 0.0011 |
| mammary gland alveolus development                                                   | 7  | 0.0011 |
| positive regulation of macrophage chemotaxis                                         | 6  | 0.0011 |
| negative thymic T cell selection                                                     | 6  | 0.0011 |
| cellular defense response                                                            | 12 | 0.0013 |
| positive regulation of phosphorylation                                               | 8  | 0.0014 |
| response to cytokine                                                                 | 11 | 0.0014 |
| response to vitamin D                                                                | 7  | 0.0015 |
| response to nutrient                                                                 | 13 | 0.0016 |
| positive regulation of interleukin-8 production                                      | 8  | 0.0017 |
| negative regulation of bone resorption                                               | 6  | 0.0017 |
| cellular response to nutrient levels                                                 | 6  | 0.0017 |
| T-helper 1 type immune response                                                      | 6  | 0.0017 |
| PERK-mediated unfolded protein response                                              | 6  | 0.0017 |
| axon extension involved in axon guidance                                             | 6  | 0.0017 |
| positive regulation of interleukin-2 biosynthetic process                            | 6  | 0.0017 |
| skeletal system development                                                          | 18 | 0.0019 |
| positive regulation of bone mineralization                                           | 9  | 0.0019 |
| BMP signaling pathway                                                                | 13 | 0.0019 |

|                                                                            |    |        |
|----------------------------------------------------------------------------|----|--------|
| regulation of blood pressure                                               | 12 | 0.0019 |
| positive regulation of dendritic cell antigen processing and presentation  | 5  | 0.0020 |
| cellular response to hormone stimulus                                      | 10 | 0.0021 |
| positive regulation of calcium-mediated signaling                          | 7  | 0.0027 |
| positive regulation of smooth muscle cell migration                        | 7  | 0.0027 |
| patterning of blood vessels                                                | 8  | 0.0027 |
| negative regulation of T cell proliferation                                | 9  | 0.0028 |
| heart development                                                          | 21 | 0.0028 |
| humoral immune response                                                    | 11 | 0.0028 |
| positive regulation of focal adhesion assembly                             | 7  | 0.0035 |
| positive regulation of NF-kappaB import into nucleus                       | 7  | 0.0035 |
| cellular response to organic cyclic compound                               | 11 | 0.0037 |
| superoxide anion generation                                                | 6  | 0.0037 |
| prostaglandin biosynthetic process                                         | 6  | 0.0037 |
| phosphatidylinositol-3-phosphate biosynthetic process                      | 10 | 0.0040 |
| cellular response to transforming growth factor beta stimulus              | 10 | 0.0040 |
| iron ion homeostasis                                                       | 8  | 0.0041 |
| I-kappaB kinase/NF-kappaB signaling                                        | 11 | 0.0041 |
| cell development                                                           | 9  | 0.0047 |
| semaphorin-plexin signaling pathway involved in neuron projection guidance | 4  | 0.0050 |
| neutrophil activation involved in immune response                          | 4  | 0.0050 |
| ventral trunk neural crest cell migration                                  | 4  | 0.0050 |
| sympathetic neuron projection guidance                                     | 4  | 0.0050 |
| sympathetic neuron projection extension                                    | 4  | 0.0050 |
| protein refolding                                                          | 6  | 0.0051 |
| positive regulation of cellular protein metabolic process                  | 6  | 0.0051 |
| calcium-mediated signaling                                                 | 10 | 0.0052 |
| response to retinoic acid                                                  | 9  | 0.0054 |
| positive regulation of interleukin-10 production                           | 7  | 0.0056 |
| response to bacterium                                                      | 7  | 0.0056 |
| positive regulation of chemokine secretion                                 | 5  | 0.0058 |
| response to molecule of bacterial origin                                   | 5  | 0.0058 |
| positive regulation of monocyte chemotaxis                                 | 6  | 0.0069 |
| astrocyte development                                                      | 6  | 0.0069 |
| neurotrophin TRK receptor signaling pathway                                | 6  | 0.0069 |
| response to interferon-gamma                                               | 7  | 0.0071 |
| positive regulation of cell adhesion                                       | 9  | 0.0073 |
| cell redox homeostasis                                                     | 12 | 0.0076 |
| lipid metabolic process                                                    | 18 | 0.0082 |
| epithelial to mesenchymal transition                                       | 8  | 0.0085 |
| sprouting angiogenesis                                                     | 7  | 0.0087 |

|                                                                                                      |    |        |
|------------------------------------------------------------------------------------------------------|----|--------|
| positive regulation of cytokine secretion                                                            | 7  | 0.0087 |
| positive regulation of T cell migration                                                              | 5  | 0.0089 |
| negative regulation of hormone secretion                                                             | 5  | 0.0089 |
| dendritic cell chemotaxis                                                                            | 6  | 0.0090 |
| lymph node development                                                                               | 6  | 0.0090 |
| positive regulation of myoblast fusion                                                               | 6  | 0.0090 |
| blood circulation                                                                                    | 9  | 0.0096 |
| triglyceride homeostasis                                                                             | 7  | 0.0106 |
| peptide antigen assembly with MHC class II protein complex                                           | 4  | 0.0107 |
| positive regulation of transcription from RNA polymerase II promoter in response to oxidative stress | 4  | 0.0107 |
| dichotomous subdivision of terminal units involved in salivary gland branching                       | 4  | 0.0107 |
| neural crest cell migration involved in autonomic nervous system development                         | 4  | 0.0107 |
| negative regulation of cysteine-type endopeptidase activity involved in apoptotic process            | 11 | 0.0113 |
| positive regulation of T cell activation                                                             | 6  | 0.0116 |
| toll-like receptor 4 signaling pathway                                                               | 6  | 0.0116 |
| positive regulation of peptidyl-serine phosphorylation                                               | 11 | 0.0126 |
| positive regulation of release of sequestered calcium ion into cytosol                               | 7  | 0.0126 |
| positive regulation of positive chemotaxis                                                           | 5  | 0.0126 |
| leukocyte migration involved in inflammatory response                                                | 5  | 0.0126 |
| positive regulation of mast cell degranulation                                                       | 5  | 0.0126 |
| negative regulation of cell adhesion                                                                 | 8  | 0.0133 |
| defense response to protozoan                                                                        | 6  | 0.0148 |
| T cell proliferation                                                                                 | 6  | 0.0148 |
| positive regulation of release of cytochrome c from mitochondria                                     | 7  | 0.0151 |
| regulation of transcription from RNA polymerase II promoter in response to hypoxia                   | 7  | 0.0151 |
| TRIF-dependent toll-like receptor signaling pathway                                                  | 7  | 0.0151 |
| positive regulation of osteoblast differentiation                                                    | 10 | 0.0151 |
| ERBB2 signaling pathway                                                                              | 8  | 0.0153 |
| movement of cell or subcellular component                                                            | 12 | 0.0173 |
| negative regulation of immune response                                                               | 5  | 0.0174 |
| I-kappaB phosphorylation                                                                             | 5  | 0.0174 |
| activation of transmembrane receptor protein tyrosine kinase activity                                | 5  | 0.0174 |
| negative regulation of blood coagulation                                                             | 5  | 0.0174 |
| positive regulation of chemotaxis                                                                    | 5  | 0.0174 |
| acute-phase response                                                                                 | 8  | 0.0174 |
| negative regulation of smooth muscle cell proliferation                                              | 7  | 0.0174 |

|                                                                                            |    |        |
|--------------------------------------------------------------------------------------------|----|--------|
| B cell activation                                                                          | 7  | 0.0174 |
| homeostasis of number of cells within a tissue                                             | 7  | 0.0174 |
| negative regulation of endothelial cell proliferation                                      | 7  | 0.0174 |
| endothelial cell migration                                                                 | 7  | 0.0174 |
| liver regeneration                                                                         | 7  | 0.0174 |
| decidualization                                                                            | 6  | 0.0177 |
| positive regulation of pri-miRNA transcription from RNA polymerase II promoter             | 6  | 0.0177 |
| cellular response to prostaglandin D stimulus                                              | 4  | 0.0181 |
| regulation of adaptive immune response                                                     | 4  | 0.0181 |
| leukotriene signaling pathway                                                              | 4  | 0.0181 |
| positive regulation of cAMP metabolic process                                              | 4  | 0.0181 |
| positive regulation of mast cell chemotaxis                                                | 4  | 0.0181 |
| positive regulation of receptor binding                                                    | 4  | 0.0181 |
| negative regulation of viral process                                                       | 4  | 0.0181 |
| vascular endothelial growth factor signaling pathway                                       | 4  | 0.0181 |
| positive regulation of type 2 immune response                                              | 4  | 0.0181 |
| cell migration                                                                             | 18 | 0.0186 |
| glucose homeostasis                                                                        | 13 | 0.0188 |
| negative regulation of transcription from RNA polymerase II promoter                       | 50 | 0.0198 |
| cellular response to fibroblast growth factor stimulus                                     | 7  | 0.0198 |
| positive regulation of reactive oxygen species metabolic process                           | 7  | 0.0198 |
| response to testosterone                                                                   | 7  | 0.0198 |
| calcium ion transport                                                                      | 11 | 0.0206 |
| positive regulation of axonogenesis                                                        | 6  | 0.0211 |
| cytolysis                                                                                  | 6  | 0.0211 |
| positive regulation of nitric-oxide synthase biosynthetic process                          | 5  | 0.0213 |
| acute inflammatory response                                                                | 5  | 0.0213 |
| positive regulation of interleukin-17 production                                           | 5  | 0.0213 |
| regulation of peptidyl-tyrosine phosphorylation                                            | 5  | 0.0213 |
| lipxygenase pathway                                                                        | 5  | 0.0213 |
| pathway-restricted SMAD protein phosphorylation                                            | 5  | 0.0213 |
| response to yeast                                                                          | 5  | 0.0213 |
| positive regulation of T cell mediated cytotoxicity                                        | 5  | 0.0213 |
| regulation of myelination                                                                  | 5  | 0.0213 |
| activation of cysteine-type endopeptidase activity involved in apoptotic signaling pathway | 5  | 0.0213 |
| positive regulation of urine volume                                                        | 5  | 0.0213 |
| positive regulation of macrophage differentiation                                          | 5  | 0.0213 |
| positive regulation of JNK cascade                                                         | 10 | 0.0230 |
| embryo implantation                                                                        | 8  | 0.0241 |
| cellular response to cytokine stimulus                                                     | 6  | 0.0251 |



|    |                                                                           |     |        |
|----|---------------------------------------------------------------------------|-----|--------|
|    | transforming growth factor beta receptor signaling pathway                | 12  | 0.0256 |
|    | organ morphogenesis                                                       | 12  | 0.0256 |
|    | regulation of cell adhesion                                               | 8   | 0.0273 |
|    | response to insulin                                                       | 10  | 0.0276 |
|    | humoral immune response mediated by circulating immunoglobulin            | 4   | 0.0276 |
|    | positive regulation of axon extension involved in axon guidance           | 4   | 0.0276 |
|    | retina vasculature development in camera-type eye                         | 4   | 0.0276 |
|    | positive regulation of interleukin-13 production                          | 4   | 0.0276 |
|    | response to dexamethasone                                                 | 4   | 0.0276 |
|    | positive regulation of endothelial cell apoptotic process                 | 5   | 0.0277 |
|    | branching morphogenesis of an epithelial tube                             | 6   | 0.0299 |
|    | positive regulation of collagen biosynthetic process                      | 6   | 0.0299 |
|    | protein kinase B signaling                                                | 7   | 0.0300 |
|    | cholesterol metabolic process                                             | 10  | 0.0300 |
|    | negative regulation of neuron projection development                      | 8   | 0.0301 |
|    | signal transduction by protein phosphorylation                            | 8   | 0.0301 |
|    | cell growth                                                               | 9   | 0.0310 |
|    | inflammatory response to antigenic stimulus                               | 5   | 0.0356 |
|    | positive regulation of erythrocyte differentiation                        | 6   | 0.0356 |
|    | positive regulation of epidermal growth factor receptor signaling pathway | 6   | 0.0356 |
|    | response to calcium ion                                                   | 9   | 0.0383 |
|    | activation of MAPKK activity                                              | 8   | 0.0383 |
|    | reactive oxygen species metabolic process                                 | 7   | 0.0397 |
|    | negative regulation of collagen biosynthetic process                      | 4   | 0.0405 |
|    | regulation of T cell differentiation                                      | 4   | 0.0405 |
|    | mast cell activation                                                      | 4   | 0.0405 |
|    | negative regulation of transposition                                      | 4   | 0.0405 |
|    | regulation of type B pancreatic cell proliferation                        | 4   | 0.0405 |
|    | response to tumor necrosis factor                                         | 6   | 0.0418 |
|    | intrinsic apoptotic signaling pathway in response to DNA damage           | 8   | 0.0422 |
|    | positive regulation of protein kinase activity                            | 8   | 0.0422 |
|    | positive regulation of calcium ion import                                 | 5   | 0.0439 |
|    | response to muscle stretch                                                | 5   | 0.0439 |
|    | positive regulation of macrophage derived foam cell differentiation       | 5   | 0.0439 |
|    | activation of phospholipase C activity                                    | 6   | 0.0489 |
|    | activation of protein kinase B activity                                   | 6   | 0.0489 |
| CC | extracellular region                                                      | 225 | 0.0000 |
|    | extracellular space                                                       | 204 | 0.0000 |
|    | plasma membrane                                                           | 370 | 0.0000 |
|    | integral component of plasma membrane                                     | 190 | 0.0000 |

|    |                                                                      |     |        |
|----|----------------------------------------------------------------------|-----|--------|
|    | cell surface                                                         | 106 | 0.0000 |
|    | external side of plasma membrane                                     | 65  | 0.0000 |
|    | extracellular exosome                                                | 214 | 0.0000 |
|    | blood microparticle                                                  | 36  | 0.0000 |
|    | integral component of luminal side of endoplasmic reticulum membrane | 18  | 0.0000 |
|    | ER to Golgi transport vesicle membrane                               | 21  | 0.0000 |
|    | MHC class II protein complex                                         | 15  | 0.0000 |
|    | membrane raft                                                        | 38  | 0.0000 |
|    | receptor complex                                                     | 28  | 0.0000 |
|    | MHC class I protein complex                                          | 10  | 0.0000 |
|    | semaphorin receptor complex                                          | 10  | 0.0000 |
|    | membrane                                                             | 147 | 0.0000 |
|    | T cell receptor complex                                              | 10  | 0.0000 |
|    | immunoglobulin complex, circulating                                  | 10  | 0.0000 |
|    | endocytic vesicle membrane                                           | 16  | 0.0000 |
|    | integral component of membrane                                       | 276 | 0.0000 |
|    | platelet alpha granule lumen                                         | 14  | 0.0000 |
|    | perinuclear region of cytoplasm                                      | 53  | 0.0000 |
|    | phagocytic vesicle membrane                                          | 13  | 0.0001 |
|    | clathrin-coated endocytic vesicle membrane                           | 11  | 0.0001 |
|    | cytosol                                                              | 182 | 0.0002 |
|    | focal adhesion                                                       | 36  | 0.0002 |
|    | alpha-beta T cell receptor complex                                   | 5   | 0.0002 |
|    | endosome membrane                                                    | 21  | 0.0010 |
|    | extrinsic component of cytoplasmic side of plasma membrane           | 12  | 0.0012 |
|    | transport vesicle membrane                                           | 9   | 0.0016 |
|    | HFE-transferrin receptor complex                                     | 5   | 0.0022 |
|    | immunological synapse                                                | 8   | 0.0046 |
|    | basolateral plasma membrane                                          | 19  | 0.0050 |
|    | Golgi membrane                                                       | 42  | 0.0076 |
|    | lysosomal membrane                                                   | 24  | 0.0099 |
|    | endosome                                                             | 21  | 0.0102 |
|    | protein complex                                                      | 31  | 0.0172 |
|    | Golgi lumen                                                          | 12  | 0.0188 |
|    | apical plasma membrane                                               | 24  | 0.0196 |
|    | phosphatidylinositol 3-kinase complex                                | 5   | 0.0196 |
|    | lysosomal lumen                                                      | 11  | 0.0228 |
|    | early endosome membrane                                              | 13  | 0.0258 |
|    | caveola                                                              | 9   | 0.0428 |
|    | B cell receptor complex                                              | 3   | 0.0428 |
|    | TAP complex                                                          | 3   | 0.0428 |
| MF | antigen binding                                                      | 55  | 0.0000 |

|                                                                                                    |     |        |
|----------------------------------------------------------------------------------------------------|-----|--------|
| growth factor activity                                                                             | 59  | 0.0000 |
| cytokine activity                                                                                  | 56  | 0.0000 |
| receptor binding                                                                                   | 68  | 0.0000 |
| steroid hormone receptor activity                                                                  | 27  | 0.0000 |
| cytokine receptor activity                                                                         | 22  | 0.0000 |
| chemokine activity                                                                                 | 24  | 0.0000 |
| serine-type endopeptidase activity                                                                 | 49  | 0.0000 |
| receptor activity                                                                                  | 43  | 0.0000 |
| peptide antigen binding                                                                            | 17  | 0.0000 |
| phosphatidylinositol-4,5-bisphosphate 3-kinase activity                                            | 23  | 0.0000 |
| semaphorin receptor binding                                                                        | 15  | 0.0000 |
| protein tyrosine kinase activity                                                                   | 31  | 0.0000 |
| tumor necrosis factor-activated receptor activity                                                  | 15  | 0.0000 |
| Ras guanyl-nucleotide exchange factor activity                                                     | 28  | 0.0000 |
| chemorepellent activity                                                                            | 15  | 0.0000 |
| semaphorin receptor activity                                                                       | 11  | 0.0000 |
| RNA polymerase II transcription factor activity, ligand-activated<br>sequence-specific DNA binding | 16  | 0.0000 |
| immunoglobulin receptor binding                                                                    | 14  | 0.0000 |
| protein binding                                                                                    | 471 | 0.0000 |
| MHC class II receptor activity                                                                     | 11  | 0.0000 |
| heparin binding                                                                                    | 30  | 0.0000 |
| glycoprotein binding                                                                               | 19  | 0.0000 |
| transmembrane signaling receptor activity                                                          | 34  | 0.0000 |
| hormone activity                                                                                   | 21  | 0.0000 |
| growth factor binding                                                                              | 12  | 0.0000 |
| chemoattractant activity                                                                           | 12  | 0.0000 |
| transforming growth factor beta receptor binding                                                   | 14  | 0.0000 |
| tumor necrosis factor receptor binding                                                             | 12  | 0.0000 |
| coreceptor activity                                                                                | 12  | 0.0000 |
| neuropilin binding                                                                                 | 9   | 0.0000 |
| protein homodimerization activity                                                                  | 65  | 0.0000 |
| MHC class II protein complex binding                                                               | 9   | 0.0000 |
| chemokine receptor activity                                                                        | 9   | 0.0000 |
| vascular endothelial growth factor-activated receptor activity                                     | 6   | 0.0001 |
| transmembrane receptor protein tyrosine kinase activity                                            | 11  | 0.0001 |
| identical protein binding                                                                          | 60  | 0.0002 |
| non-membrane spanning protein tyrosine kinase activity                                             | 11  | 0.0006 |
| platelet-derived growth factor receptor binding                                                    | 7   | 0.0006 |
| enzyme binding                                                                                     | 33  | 0.0006 |
| epidermal growth factor receptor binding                                                           | 9   | 0.0009 |
| protein kinase binding                                                                             | 35  | 0.0011 |
| beta-2-microglobulin binding                                                                       | 6   | 0.0012 |

|                                                                                                               |    |        |
|---------------------------------------------------------------------------------------------------------------|----|--------|
| receptor tyrosine kinase binding                                                                              | 10 | 0.0017 |
| 1-phosphatidylinositol-3-kinase activity                                                                      | 10 | 0.0017 |
| cytokine binding                                                                                              | 7  | 0.0022 |
| transforming growth factor beta-activated receptor activity                                                   | 5  | 0.0022 |
| peptide hormone binding                                                                                       | 8  | 0.0023 |
| virus receptor activity                                                                                       | 12 | 0.0039 |
| TAP1 binding                                                                                                  | 4  | 0.0057 |
| leukotriene receptor activity                                                                                 | 4  | 0.0057 |
| retinoid X receptor binding                                                                                   | 6  | 0.0057 |
| CCR chemokine receptor binding                                                                                | 7  | 0.0062 |
| CXCR chemokine receptor binding                                                                               | 5  | 0.0063 |
| kinase activity                                                                                               | 24 | 0.0063 |
| transforming growth factor beta binding                                                                       | 6  | 0.0074 |
| receptor signaling protein tyrosine kinase activity                                                           | 5  | 0.0098 |
| signal transducer activity                                                                                    | 21 | 0.0100 |
| integrin binding                                                                                              | 14 | 0.0101 |
| vascular endothelial growth factor binding                                                                    | 4  | 0.0112 |
| interleukin-20 binding                                                                                        | 4  | 0.0112 |
| retinoic acid receptor activity                                                                               | 4  | 0.0112 |
| CXCR3 chemokine receptor binding                                                                              | 4  | 0.0112 |
| G-protein coupled peptide receptor activity                                                                   | 6  | 0.0119 |
| steroid binding                                                                                               | 7  | 0.0128 |
| MHC class I protein binding                                                                                   | 6  | 0.0148 |
| fatty acid binding                                                                                            | 6  | 0.0148 |
| protein heterodimerization activity                                                                           | 36 | 0.0172 |
| activin binding                                                                                               | 5  | 0.0178 |
| antioxidant activity                                                                                          | 6  | 0.0183 |
| T cell receptor binding                                                                                       | 4  | 0.0192 |
| S100 protein binding                                                                                          | 5  | 0.0237 |
| type II transforming growth factor beta receptor binding                                                      | 4  | 0.0308 |
| small molecule binding                                                                                        | 4  | 0.0308 |
| C-X-C chemokine receptor activity                                                                             | 4  | 0.0308 |
| transcriptional activator activity, RNA polymerase II core promoter proximal region sequence-specific binding | 21 | 0.0438 |
| ubiquitin protein ligase binding                                                                              | 24 | 0.0447 |
| chemokine receptor binding                                                                                    | 4  | 0.0447 |
| bile acid binding                                                                                             | 4  | 0.0447 |
| D-glucose transmembrane transporter activity                                                                  | 4  | 0.0447 |
| receptor agonist activity                                                                                     | 5  | 0.0484 |

**Supplementary table 4** The significantly enriched KGEE pathways for 784 FI-DEGs between the normal and patients with KIRC.

| Term                                                  | Count | FDR    |
|-------------------------------------------------------|-------|--------|
| hsa04060:Cytokine-cytokine receptor interaction       | 113   | 0.0000 |
| hsa04650:Natural killer cell mediated cytotoxicity    | 52    | 0.0000 |
| hsa04612:Antigen processing and presentation          | 41    | 0.0000 |
| hsa05323:Rheumatoid arthritis                         | 41    | 0.0000 |
| hsa05332:Graft-versus-host disease                    | 25    | 0.0000 |
| hsa05416:Viral myocarditis                            | 32    | 0.0000 |
| hsa05330:Allograft rejection                          | 26    | 0.0000 |
| hsa04660:T cell receptor signaling pathway            | 41    | 0.0000 |
| hsa04662:B cell receptor signaling pathway            | 33    | 0.0000 |
| hsa05166:HTLV-I infection                             | 64    | 0.0000 |
| hsa04064:NF-kappa B signaling pathway                 | 36    | 0.0000 |
| hsa05164:Influenza A                                  | 51    | 0.0000 |
| hsa05200:Pathways in cancer                           | 81    | 0.0000 |
| hsa04672:Intestinal immune network for IgA production | 26    | 0.0000 |
| hsa04062:Chemokine signaling pathway                  | 52    | 0.0000 |
| hsa05320:Autoimmune thyroid disease                   | 27    | 0.0000 |
| hsa05162:Measles                                      | 43    | 0.0000 |
| hsa04630:Jak-STAT signaling pathway                   | 45    | 0.0000 |
| hsa04940:Type I diabetes mellitus                     | 24    | 0.0000 |
| hsa05168:Herpes simplex infection                     | 49    | 0.0000 |
| hsa05169:Epstein-Barr virus infection                 | 39    | 0.0000 |
| hsa05321:Inflammatory bowel disease (IBD)             | 28    | 0.0000 |
| hsa04151:PI3K-Akt signaling pathway                   | 70    | 0.0000 |
| hsa05150:Staphylococcus aureus infection              | 25    | 0.0000 |
| hsa04668:TNF signaling pathway                        | 35    | 0.0000 |
| hsa05145:Toxoplasmosis                                | 35    | 0.0000 |
| hsa04380:Osteoclast differentiation                   | 38    | 0.0000 |
| hsa04640:Hematopoietic cell lineage                   | 30    | 0.0000 |
| hsa05140:Leishmaniasis                                | 27    | 0.0000 |
| hsa05340:Primary immunodeficiency                     | 19    | 0.0000 |
| hsa04360:Axon guidance                                | 36    | 0.0000 |
| hsa04015:Rap1 signaling pathway                       | 48    | 0.0000 |
| hsa04014:Ras signaling pathway                        | 50    | 0.0000 |
| hsa05152:Tuberculosis                                 | 43    | 0.0000 |
| hsa04066:HIF-1 signaling pathway                      | 30    | 0.0000 |
| hsa04514:Cell adhesion molecules (CAMs)               | 37    | 0.0000 |
| hsa04620:Toll-like receptor signaling pathway         | 30    | 0.0000 |
| hsa05214:Glioma                                       | 23    | 0.0000 |
| hsa04012:ErbB signaling pathway                       | 26    | 0.0000 |
| hsa04145:Phagosome                                    | 35    | 0.0000 |
| hsa05310:Asthma                                       | 15    | 0.0000 |
| hsa05142:Chagas disease (American trypanosomiasis)    | 28    | 0.0000 |

|                                                                     |    |        |
|---------------------------------------------------------------------|----|--------|
| hsa05218:Melanoma                                                   | 22 | 0.0000 |
| hsa04664:Fc epsilon RI signaling pathway                            | 21 | 0.0000 |
| hsa04210:Apoptosis                                                  | 20 | 0.0000 |
| hsa04010:MAPK signaling pathway                                     | 45 | 0.0000 |
| hsa05144:Malaria                                                    | 17 | 0.0000 |
| hsa05215:Prostate cancer                                            | 23 | 0.0000 |
| hsa05205:Proteoglycans in cancer                                    | 37 | 0.0000 |
| hsa05161:Hepatitis B                                                | 30 | 0.0000 |
| hsa05160:Hepatitis C                                                | 28 | 0.0000 |
| hsa05211:Renal cell carcinoma                                       | 18 | 0.0000 |
| hsa05134:Legionellosis                                              | 16 | 0.0000 |
| hsa04370:VEGF signaling pathway                                     | 17 | 0.0000 |
| hsa04915:Estrogen signaling pathway                                 | 22 | 0.0001 |
| hsa04510:Focal adhesion                                             | 35 | 0.0001 |
| hsa05230:Central carbon metabolism in cancer                        | 17 | 0.0001 |
| hsa05220:Chronic myeloid leukemia                                   | 18 | 0.0001 |
| hsa03320:PPAR signaling pathway                                     | 17 | 0.0001 |
| hsa05219:Bladder cancer                                             | 13 | 0.0001 |
| hsa05223:Non-small cell lung cancer                                 | 15 | 0.0002 |
| hsa05231:Choline metabolism in cancer                               | 21 | 0.0002 |
| hsa04068:FoxO signaling pathway                                     | 25 | 0.0002 |
| hsa05212:Pancreatic cancer                                          | 15 | 0.0010 |
| hsa04670:Leukocyte transendothelial migration                       | 21 | 0.0013 |
| hsa04666:Fc gamma R-mediated phagocytosis                           | 17 | 0.0016 |
| hsa04621:NOD-like receptor signaling pathway                        | 13 | 0.0025 |
| hsa05133:Pertussis                                                  | 15 | 0.0040 |
| hsa05120:Epithelial cell signaling in Helicobacter pylori infection | 14 | 0.0040 |
| hsa04722:Neurotrophin signaling pathway                             | 20 | 0.0051 |
| hsa04920:Adipocytokine signaling pathway                            | 14 | 0.0059 |
| hsa04080:Neuroactive ligand-receptor interaction                    | 36 | 0.0064 |
| hsa04917:Prolactin signaling pathway                                | 14 | 0.0065 |
| hsa05143:African trypanosomiasis                                    | 9  | 0.0067 |
| hsa05221:Acute myeloid leukemia                                     | 12 | 0.0073 |
| hsa04810:Regulation of actin cytoskeleton                           | 29 | 0.0073 |
| hsa05132:Salmonella infection                                       | 15 | 0.0095 |
| hsa04350:TGF-beta signaling pathway                                 | 15 | 0.0104 |
| hsa04610:Complement and coagulation cascades                        | 13 | 0.0131 |
| hsa05210:Colorectal cancer                                          | 12 | 0.0152 |
| hsa05322:Systemic lupus erythematosus                               | 20 | 0.0152 |
| hsa04931:Insulin resistance                                         | 17 | 0.0179 |
| hsa04623:Cytosolic DNA-sensing pathway                              | 12 | 0.0188 |
| hsa04550:Signaling pathways regulating pluripotency of stem cells   | 20 | 0.0231 |
| hsa04932:Non-alcoholic fatty liver disease (NAFLD)                  | 21 | 0.0249 |

|                             |    |        |
|-----------------------------|----|--------|
| hsa05146:Amoebiasis         | 16 | 0.0315 |
| hsa05213:Endometrial cancer | 10 | 0.0325 |

**Supplementary table 5** The significantly enriched GO term pathways for 226 FI-DEGs between KIRC patients with low risk value and KIRC patients with high risk value.

| Category_Term                                                     | Count                                                        | FDR    |        |
|-------------------------------------------------------------------|--------------------------------------------------------------|--------|--------|
| BP                                                                | immune response                                              | 44     | 0.0000 |
|                                                                   | complement activation, classical pathway                     | 21     | 0.0000 |
|                                                                   | inflammatory response                                        | 34     | 0.0000 |
|                                                                   | Fc-gamma receptor signaling pathway involved in phagocytosis | 21     | 0.0000 |
|                                                                   | complement activation                                        | 18     | 0.0000 |
|                                                                   | response to lipopolysaccharide                               | 22     | 0.0000 |
|                                                                   | receptor-mediated endocytosis                                | 22     | 0.0000 |
|                                                                   | innate immune response                                       | 30     | 0.0000 |
|                                                                   | positive regulation of B cell activation                     | 11     | 0.0000 |
|                                                                   | defense response to bacterium                                | 19     | 0.0000 |
|                                                                   | chemotaxis                                                   | 17     | 0.0000 |
|                                                                   | regulation of immune response                                | 19     | 0.0000 |
|                                                                   | Fc-epsilon receptor signaling pathway                        | 19     | 0.0000 |
|                                                                   | phagocytosis, recognition                                    | 10     | 0.0000 |
|                                                                   | B cell receptor signaling pathway                            | 12     | 0.0000 |
|                                                                   | cell-cell signaling                                          | 21     | 0.0000 |
|                                                                   | phagocytosis, engulfment                                     | 10     | 0.0000 |
|                                                                   | chemokine-mediated signaling pathway                         | 12     | 0.0000 |
|                                                                   | positive regulation of cytosolic calcium ion concentration   | 15     | 0.0000 |
|                                                                   | signal transduction                                          | 42     | 0.0000 |
|                                                                   | cell surface receptor signaling pathway                      | 19     | 0.0000 |
|                                                                   | positive regulation of MAPK cascade                          | 11     | 0.0000 |
|                                                                   | defense response to virus                                    | 14     | 0.0000 |
|                                                                   | proteolysis                                                  | 23     | 0.0000 |
|                                                                   | cytokine production                                          | 7      | 0.0000 |
|                                                                   | positive regulation of cell proliferation                    | 22     | 0.0000 |
|                                                                   | retina homeostasis                                           | 8      | 0.0000 |
|                                                                   | type I interferon signaling pathway                          | 9      | 0.0001 |
|                                                                   | cell chemotaxis                                              | 9      | 0.0001 |
|                                                                   | positive regulation of angiogenesis                          | 11     | 0.0001 |
|                                                                   | positive regulation of ERK1 and ERK2 cascade                 | 13     | 0.0001 |
|                                                                   | regulation of cell proliferation                             | 13     | 0.0002 |
| positive regulation of tumor necrosis factor biosynthetic process | 5                                                            | 0.0004 |        |
| positive regulation of NF-kappaB transcription factor activity    | 11                                                           | 0.0004 |        |
| negative regulation of viral genome replication                   | 7                                                            | 0.0005 |        |

|    |                                                                                                 |    |        |
|----|-------------------------------------------------------------------------------------------------|----|--------|
|    | response to virus                                                                               | 10 | 0.0005 |
|    | positive regulation of interleukin-8 production                                                 | 6  | 0.0007 |
|    | toll-like receptor signaling pathway                                                            | 6  | 0.0009 |
|    | negative regulation of apoptotic process                                                        | 19 | 0.0010 |
|    | astrocyte development                                                                           | 5  | 0.0016 |
|    | positive regulation of chemokine production                                                     | 5  | 0.0020 |
|    | semaphorin-plexin signaling pathway                                                             | 6  | 0.0021 |
|    | positive regulation of interferon-beta biosynthetic process                                     | 4  | 0.0024 |
|    | positive regulation of leukocyte chemotaxis                                                     | 5  | 0.0024 |
|    | acute-phase response                                                                            | 6  | 0.0045 |
|    | negative regulation of hormone secretion                                                        | 4  | 0.0076 |
|    | positive regulation of protein phosphorylation                                                  | 9  | 0.0076 |
|    | antibacterial humoral response                                                                  | 6  | 0.0076 |
|    | positive regulation of interferon-gamma production                                              | 6  | 0.0092 |
|    | regulation of cytokine secretion                                                                | 4  | 0.0097 |
|    | semaphorin-plexin signaling pathway involved in axon guidance                                   | 4  | 0.0123 |
|    | activation of transmembrane receptor protein tyrosine kinase activity                           | 4  | 0.0123 |
|    | positive regulation of nucleotide-binding oligomerization domain containing 2 signaling pathway | 3  | 0.0137 |
|    | negative regulation of cation channel activity                                                  | 3  | 0.0137 |
|    | positive regulation of gene expression                                                          | 12 | 0.0164 |
|    | positive regulation of peptidyl-tyrosine phosphorylation                                        | 7  | 0.0176 |
|    | defense response to Gram-negative bacterium                                                     | 6  | 0.0183 |
|    | positive regulation of MAP kinase activity                                                      | 6  | 0.0248 |
|    | positive regulation of interferon-alpha biosynthetic process                                    | 3  | 0.0248 |
|    | transmembrane receptor protein tyrosine kinase signaling pathway                                | 7  | 0.0376 |
|    | cytokine-mediated signaling pathway                                                             | 8  | 0.0379 |
|    | neutrophil chemotaxis                                                                           | 6  | 0.0386 |
|    | positive regulation of Ras protein signal transduction                                          | 4  | 0.0411 |
|    | defense response to protozoan                                                                   | 4  | 0.0411 |
|    | negative regulation of cysteine-type endopeptidase activity involved in apoptotic process       | 6  | 0.0449 |
|    | embryo implantation                                                                             | 5  | 0.0463 |
|    | Ras protein signal transduction                                                                 | 6  | 0.0464 |
|    | interferon-gamma-mediated signaling pathway                                                     | 6  | 0.0487 |
| CC | extracellular space                                                                             | 75 | 0.0000 |
|    | extracellular region                                                                            | 81 | 0.0000 |
|    | blood microparticle                                                                             | 20 | 0.0000 |
|    | integral component of plasma membrane                                                           | 52 | 0.0000 |
|    | external side of plasma membrane                                                                | 21 | 0.0000 |
|    | plasma membrane                                                                                 | 93 | 0.0000 |
|    | immunoglobulin complex, circulating                                                             | 8  | 0.0000 |



|    |                                    |    |        |
|----|------------------------------------|----|--------|
|    | extracellular exosome              | 61 | 0.0000 |
|    | cell surface                       | 19 | 0.0017 |
|    | endosome membrane                  | 10 | 0.0067 |
|    | receptor complex                   | 8  | 0.0132 |
| MF | antigen binding                    | 22 | 0.0000 |
|    | serine-type endopeptidase activity | 23 | 0.0000 |
|    | growth factor activity             | 19 | 0.0000 |
|    | immunoglobulin receptor binding    | 10 | 0.0000 |
|    | chemokine activity                 | 10 | 0.0000 |
|    | cytokine receptor activity         | 9  | 0.0000 |
|    | receptor binding                   | 20 | 0.0000 |
|    | heparin binding                    | 12 | 0.0003 |
|    | cytokine activity                  | 12 | 0.0007 |
|    | retinoid binding                   | 4  | 0.0043 |
|    | CXCR chemokine receptor binding    | 4  | 0.0058 |
|    | hormone activity                   | 8  | 0.0064 |
|    | peptide hormone binding            | 5  | 0.0107 |
|    | steroid hormone receptor activity  | 6  | 0.0201 |
|    | neuropilin binding                 | 4  | 0.0217 |
|    | transporter activity               | 10 | 0.0279 |
|    | CXCR3 chemokine receptor binding   | 3  | 0.0365 |
|    | receptor activity                  | 10 | 0.0406 |

**Supplementary table 6** The significantly enriched KGEE pathways for 226 FI-DEGs between KIRC patients with low risk value and KIRC patients with high risk value.

| Term                                            | Count | FDR    |
|-------------------------------------------------|-------|--------|
| hsa04060:Cytokine-cytokine receptor interaction | 32    | 0.0000 |
| hsa04630:Jak-STAT signaling pathway             | 17    | 0.0000 |
| hsa04062:Chemokine signaling pathway            | 18    | 0.0000 |
| hsa04620:Toll-like receptor signaling pathway   | 13    | 0.0001 |
| hsa05164:Influenza A                            | 13    | 0.0063 |
| hsa05214:Glioma                                 | 8     | 0.0083 |
| hsa05161:Hepatitis B                            | 11    | 0.0142 |
| hsa05134:Legionellosis                          | 7     | 0.0142 |
| hsa04360:Axon guidance                          | 10    | 0.0184 |
| hsa05219:Bladder cancer                         | 6     | 0.0208 |
| hsa05162:Measles                                | 10    | 0.0208 |
| hsa04640:Hematopoietic cell lineage             | 8     | 0.0240 |
| hsa04014:Ras signaling pathway                  | 13    | 0.0249 |
| hsa05200:Pathways in cancer                     | 18    | 0.0272 |
| hsa04151:PI3K-Akt signaling pathway             | 16    | 0.0418 |

|                                              |   |        |
|----------------------------------------------|---|--------|
| hsa04612:Antigen processing and presentation | 7 | 0.0418 |
|----------------------------------------------|---|--------|
